# Supplementary material for: Patient-reported outcome measures in the interaction between patient and clinician – a multi-perspective qualitative study
Source: PubMed Central journal article supplement (PMC6952477; doi:10.1186/s41687-019-0170-x), 2020-01-09

When did you have your most recent epileptic seizure? (Write year and month - write "?" if you do not remember)

Year (f. ex. 2011)::

Month no. (f. ex. 11):

How many seizures did you have last year? (if none, write 0)

Number of attacks: :

How many absence seizures have you had in the last 3 months?

Number of attacks: :

How many generalized seizures (convulsions) have you had during the last 3 months?

Number of attacks: :

Answer the following questions only if you have had at least 1 epileptic seizure during the last year

|                                                                                                                         |                                 |                                                        |                                                                               |
|-------------------------------------------------------------------------------------------------------------------------|---------------------------------|--------------------------------------------------------|-------------------------------------------------------------------------------|
| Do your epileptic seizures occur during sleep?                                                                          | <input type="checkbox"/><br>Yes | <input type="checkbox"/><br>No                         |                                                                               |
| Are your seizures getting worse?                                                                                        | <input type="checkbox"/><br>Yes | <input type="checkbox"/><br>No                         |                                                                               |
| Have you sustained an injury during a seizure?                                                                          | <input type="checkbox"/><br>No  | <input type="checkbox"/><br>Yes, but not a serious one | <input type="checkbox"/><br>Serious damage (f. ex. bone fracture, cut wounds) |
| Have you been in contact with an emergency room because of epilepsy since your last visit to the outpatient department? | <input type="checkbox"/><br>Yes | <input type="checkbox"/><br>No                         |                                                                               |

Are your relatives worried about you because of your epilepsy?

|              |                                   |                                    |                                          |                                        |                                         |                                            |
|--------------|-----------------------------------|------------------------------------|------------------------------------------|----------------------------------------|-----------------------------------------|--------------------------------------------|
| Put one tick | <input type="checkbox"/><br>Never | <input type="checkbox"/><br>Rarely | <input type="checkbox"/><br>Occasionally | <input type="checkbox"/><br>Frequently | <input type="checkbox"/><br>Do not know | <input type="checkbox"/><br>Not applicable |
|--------------|-----------------------------------|------------------------------------|------------------------------------------|----------------------------------------|-----------------------------------------|--------------------------------------------|

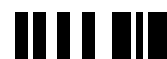

During the last 4 weeks to what degree have you suffered from:

|                                                            |                                   |                                          |                                       |                                   |                                        |
|------------------------------------------------------------|-----------------------------------|------------------------------------------|---------------------------------------|-----------------------------------|----------------------------------------|
| Headache                                                   | <input type="checkbox"/><br>Never | <input type="checkbox"/><br>Occasionally | <input type="checkbox"/><br>Sometimes | <input type="checkbox"/><br>Often | <input type="checkbox"/><br>Very often |
| Dizziness                                                  | <input type="checkbox"/><br>Never | <input type="checkbox"/><br>Occasionally | <input type="checkbox"/><br>Sometimes | <input type="checkbox"/><br>Often | <input type="checkbox"/><br>Very often |
| Tremor/shaking                                             | <input type="checkbox"/><br>Never | <input type="checkbox"/><br>Occasionally | <input type="checkbox"/><br>Sometimes | <input type="checkbox"/><br>Often | <input type="checkbox"/><br>Very often |
| Double vision or other visual disturbances                 | <input type="checkbox"/><br>Never | <input type="checkbox"/><br>Occasionally | <input type="checkbox"/><br>Sometimes | <input type="checkbox"/><br>Often | <input type="checkbox"/><br>Very often |
| Loss of appetite                                           | <input type="checkbox"/><br>Never | <input type="checkbox"/><br>Occasionally | <input type="checkbox"/><br>Sometimes | <input type="checkbox"/><br>Often | <input type="checkbox"/><br>Very often |
| Eating too much                                            | <input type="checkbox"/><br>Never | <input type="checkbox"/><br>Occasionally | <input type="checkbox"/><br>Sometimes | <input type="checkbox"/><br>Often | <input type="checkbox"/><br>Very often |
| Difficulty remembering                                     | <input type="checkbox"/><br>Never | <input type="checkbox"/><br>Occasionally | <input type="checkbox"/><br>Sometimes | <input type="checkbox"/><br>Often | <input type="checkbox"/><br>Very often |
| Difficulty concentrating                                   | <input type="checkbox"/><br>Never | <input type="checkbox"/><br>Occasionally | <input type="checkbox"/><br>Sometimes | <input type="checkbox"/><br>Often | <input type="checkbox"/><br>Very often |
| A feeling that you easily become aggressive                | <input type="checkbox"/><br>Never | <input type="checkbox"/><br>Occasionally | <input type="checkbox"/><br>Sometimes | <input type="checkbox"/><br>Often | <input type="checkbox"/><br>very often |
| Severe fatigue                                             | <input type="checkbox"/><br>Never | <input type="checkbox"/><br>Occasionally | <input type="checkbox"/><br>Sometimes | <input type="checkbox"/><br>Often | <input type="checkbox"/><br>Very often |
| Sadness                                                    | <input type="checkbox"/><br>Never | <input type="checkbox"/><br>Occasionally | <input type="checkbox"/><br>Sometimes | <input type="checkbox"/><br>Often | <input type="checkbox"/><br>Very often |
| Being afraid of having a new seizure during the next weeks | <input type="checkbox"/><br>Never | <input type="checkbox"/><br>Occasionally | <input type="checkbox"/><br>Sometimes | <input type="checkbox"/><br>Often | <input type="checkbox"/><br>Very often |
| Lack of interest or pleasure in sexual activity            | <input type="checkbox"/><br>Never | <input type="checkbox"/><br>Occasionally | <input type="checkbox"/><br>Sometimes | <input type="checkbox"/><br>Often | <input type="checkbox"/><br>Very often |
| Have you in the last 4 weeks had suicidal thoughts?        | <input type="checkbox"/><br>Never | <input type="checkbox"/><br>Occasionally | <input type="checkbox"/><br>Sometimes | <input type="checkbox"/><br>Often | <input type="checkbox"/><br>Very often |



Please indicate for each of the five statements which is closest to how you have been feeling over the last two weeks.

Over the last two weeks

|                                                            |                                             |                                              |                                                        |                                                        |                                              |                                        |
|------------------------------------------------------------|---------------------------------------------|----------------------------------------------|--------------------------------------------------------|--------------------------------------------------------|----------------------------------------------|----------------------------------------|
| I have felt cheerful and in good spirits                   | <input type="checkbox"/><br>All of the time | <input type="checkbox"/><br>Most of the time | <input type="checkbox"/><br>More than half of the time | <input type="checkbox"/><br>Less than half of the time | <input type="checkbox"/><br>Some of the time | <input type="checkbox"/><br>At no time |
| I have felt calm and relaxed                               | <input type="checkbox"/><br>All of the time | <input type="checkbox"/><br>Most of the time | <input type="checkbox"/><br>More than half of the time | <input type="checkbox"/><br>Less than half of the time | <input type="checkbox"/><br>Some of the time | <input type="checkbox"/><br>At no time |
| I have felt active and vigorous                            | <input type="checkbox"/><br>All of the time | <input type="checkbox"/><br>Most of the time | <input type="checkbox"/><br>More than half of the time | <input type="checkbox"/><br>Less than half of the time | <input type="checkbox"/><br>Some of the time | <input type="checkbox"/><br>At no time |
| I woke up feeling fresh and rested                         | <input type="checkbox"/><br>All of the time | <input type="checkbox"/><br>Most of the time | <input type="checkbox"/><br>More than half of the time | <input type="checkbox"/><br>Less than half of the time | <input type="checkbox"/><br>Some of the time | <input type="checkbox"/><br>At no time |
| My daily life has been filled with things that interest me | <input type="checkbox"/><br>All of the time | <input type="checkbox"/><br>Most of the time | <input type="checkbox"/><br>More than half of the time | <input type="checkbox"/><br>Less than half of the time | <input type="checkbox"/><br>Some of the time | <input type="checkbox"/><br>At no time |

In general, would you say your health is:

|              |                                       |                                       |                                  |                                  |                                  |
|--------------|---------------------------------------|---------------------------------------|----------------------------------|----------------------------------|----------------------------------|
| Put one tick | <input type="checkbox"/><br>Excellent | <input type="checkbox"/><br>Very good | <input type="checkbox"/><br>Good | <input type="checkbox"/><br>Fair | <input type="checkbox"/><br>Poor |
|--------------|---------------------------------------|---------------------------------------|----------------------------------|----------------------------------|----------------------------------|

Compared to one year ago, how would you rate your health in general now?

|              |                                                               |                                                                   |                                            |                                                                  |                                                          |
|--------------|---------------------------------------------------------------|-------------------------------------------------------------------|--------------------------------------------|------------------------------------------------------------------|----------------------------------------------------------|
| Put one tick | <input type="checkbox"/><br>Much better now than one year ago | <input type="checkbox"/><br>Somewhat better now than one year ago | <input type="checkbox"/><br>About the same | <input type="checkbox"/><br>Somewhat worse now than one year ago | <input type="checkbox"/><br>Much worse than one year ago |
|--------------|---------------------------------------------------------------|-------------------------------------------------------------------|--------------------------------------------|------------------------------------------------------------------|----------------------------------------------------------|

Do you have other diseases or conditions that have a greater effect on your health than your epilepsy?

- Yes
- No

The next questions deal with your medical treatment

|                                                                          |                                   |                                        |                                       |                                                |
|--------------------------------------------------------------------------|-----------------------------------|----------------------------------------|---------------------------------------|------------------------------------------------|
| How often do you think you have forgotten to take some of your medicine? | <input type="checkbox"/><br>Daily | <input type="checkbox"/><br>Weekly     | <input type="checkbox"/><br>Monthly   | <input type="checkbox"/><br>Very rarely, never |
| Does your epilepsy medicine have side effects?                           | <input type="checkbox"/><br>No    | <input type="checkbox"/><br>Yes, a few | <input type="checkbox"/><br>Yes, some | <input type="checkbox"/><br>Yes, many          |



The next questions deal with work (being a student counts as work)

|                                                            |                                         |                                            |                                         |                                                             |                                             |
|------------------------------------------------------------|-----------------------------------------|--------------------------------------------|-----------------------------------------|-------------------------------------------------------------|---------------------------------------------|
| Have you felt stressed at your work in the last 12 months? | <input type="checkbox"/><br>No          | <input type="checkbox"/><br>Yes, a bit     | <input type="checkbox"/><br>Yes, a lot  | <input type="checkbox"/><br>I'm no longer in the work force | <input type="checkbox"/><br>I'm out of work |
| How much do you now work compared with 12 months ago?      | <input type="checkbox"/><br>I work more | <input type="checkbox"/><br>About the same | <input type="checkbox"/><br>I work less | <input type="checkbox"/><br>I'm no longer in the work force | <input type="checkbox"/><br>I'm out of work |
| If you work less now, is it because of your epilepsy?      | <input type="checkbox"/><br>Yes         | <input type="checkbox"/><br>Partly         | <input type="checkbox"/><br>No          |                                                             |                                             |

Has your epilepsy put serious limitations on your life?

No

Yes, describe how:

How much alcohol do you drink on average in the course of a week? (Refers to beer, wine and spirits. If you drink less than 1 unit a week, write 0)

Write number of units:

Do you use recreational drugs? (f. ex. hash)

|              |                                   |                                     |                                    |                                   |
|--------------|-----------------------------------|-------------------------------------|------------------------------------|-----------------------------------|
| Put one tick | <input type="checkbox"/><br>Never | <input type="checkbox"/><br>Monthly | <input type="checkbox"/><br>Weekly | <input type="checkbox"/><br>Daily |
|--------------|-----------------------------------|-------------------------------------|------------------------------------|-----------------------------------|

The next questions are only relevant for women

Are you pregnant?

Yes

No

Do you plan to get pregnant within the next 12 months?

Yes

No



Supplement: 41687_2019_170_MOESM1_ESM.pdf [file 41687_2019_170_MOESM1_ESM.pdf]
